# Supplementary material
Source: publisher figshare collection journal article supplement (https://tandf.figshare.com/ndownloader/files/17839619)
Supplement: Supplementary file 1 [file 17839619]

**Supplementary Table S1. *Data abstraction sheet***

[illegible]
